# Supplementary material for: LINE-1 and Alu hypomethylation in mucoepidermoid carcinoma
Source: PubMed Central journal article supplement (PMC3610265; doi:10.1186/1472-6890-13-10), 2013-03-19
Supplement: 1472-6890-13-10-S1.pdf [file 1472-6890-13-10-S1.pdf]

**Supplement table 1. Paired comparison of LINE-1 and Alu methylation patterns among MEC cell subtypes.**

| LINE-1 methylation              |     |                 |
|---------------------------------|-----|-----------------|
| % <sup>m</sup> C                | N:I | Not analysed    |
|                                 | N:M | <i>p</i> <0.001 |
|                                 | N:S | <i>p</i> <0.001 |
|                                 | I:M | <i>p</i> =0.555 |
|                                 | I:S | Not analysed    |
|                                 | M:S | <i>p</i> <0.001 |
| % <sup>m</sup> C <sup>m</sup> C | N:I | Not analysed    |
|                                 | N:M | <i>p</i> =0.286 |
|                                 | N:S | <i>p</i> =0.198 |
|                                 | I:M | <i>p</i> =0.155 |
|                                 | I:S | Not analysed    |
|                                 | M:S | <i>p</i> =0.935 |
| % <sup>m</sup> C <sup>u</sup> C | N:I | Not analysed    |
|                                 | N:M | <i>p</i> =0.037 |
|                                 | N:S | <i>p</i> =0.097 |
|                                 | I:M | <i>p</i> =0.674 |
|                                 | I:S | Not analysed    |
|                                 | M:S | <i>p</i> =0.270 |
| % <sup>u</sup> C <sup>m</sup> C | N:I | Not analysed    |
|                                 | N:M | <i>p</i> =0.542 |
|                                 | N:S | <i>p</i> =0.043 |
|                                 | I:M | <i>p</i> =0.081 |
|                                 | I:S | Not analysed    |
|                                 | M:S | <i>p</i> =0.408 |
| % <sup>u</sup> C <sup>u</sup> C | N:I | Not analysed    |
|                                 | N:M | <i>p</i> =0.013 |
|                                 | N:S | <i>p</i> <0.001 |
|                                 | I:M | <i>p</i> =0.006 |
|                                 | I:S | Not analysed    |
|                                 | M:S | <i>p</i> =0.310 |

| Alu methylation                                                |     |                 |
|----------------------------------------------------------------|-----|-----------------|
| % <sup>m</sup> C                                               | N:I | Not analysed    |
|                                                                | N:M | <i>p</i> =0.032 |
|                                                                | N:S | <i>p</i> <0.001 |
|                                                                | I:M | <i>p</i> =0.368 |
|                                                                | I:S | Not analysed    |
|                                                                | M:S | <i>p</i> =0.008 |
| % <sup>m</sup> C <sup>m</sup> C                                | N:I | Not analysed    |
|                                                                | N:M | <i>p</i> =0.313 |
|                                                                | N:S | <i>p</i> =0.631 |
|                                                                | I:M | <i>p</i> =0.850 |
|                                                                | I:S | Not analysed    |
|                                                                | M:S | <i>p</i> =0.738 |
| % <sup>m</sup> C <sup>u</sup> C+ <sup>u</sup> C <sup>m</sup> C | N:I | Not analysed    |
|                                                                | N:M | <i>p</i> =0.937 |
|                                                                | N:S | <i>p</i> =0.210 |
|                                                                | I:M | <i>p</i> =0.563 |
|                                                                | I:S | Not analysed    |
|                                                                | M:S | <i>p</i> =0.283 |
| % <sup>u</sup> C <sup>u</sup> C                                | N:I | Not analysed    |
|                                                                | N:M | <i>p</i> =0.032 |
|                                                                | N:S | <i>p</i> <0.001 |
|                                                                | I:M | <i>p</i> =0.368 |
|                                                                | I:S | Not analysed    |
|                                                                | M:S | <i>p</i> =0.008 |

MEC: Mucoepidermoid carcinoma  
N: Adjacent normal salivary gland cell  
I: Intermediate cell  
M: Mucous cell  
S: Squamous cell
